# Supplementary material
Source: Springer Nature journal article supplement (https://www.springermedizin.de/resource/supplementary/13031_2009_49_MOESM2_ESM.pdf/9645044)

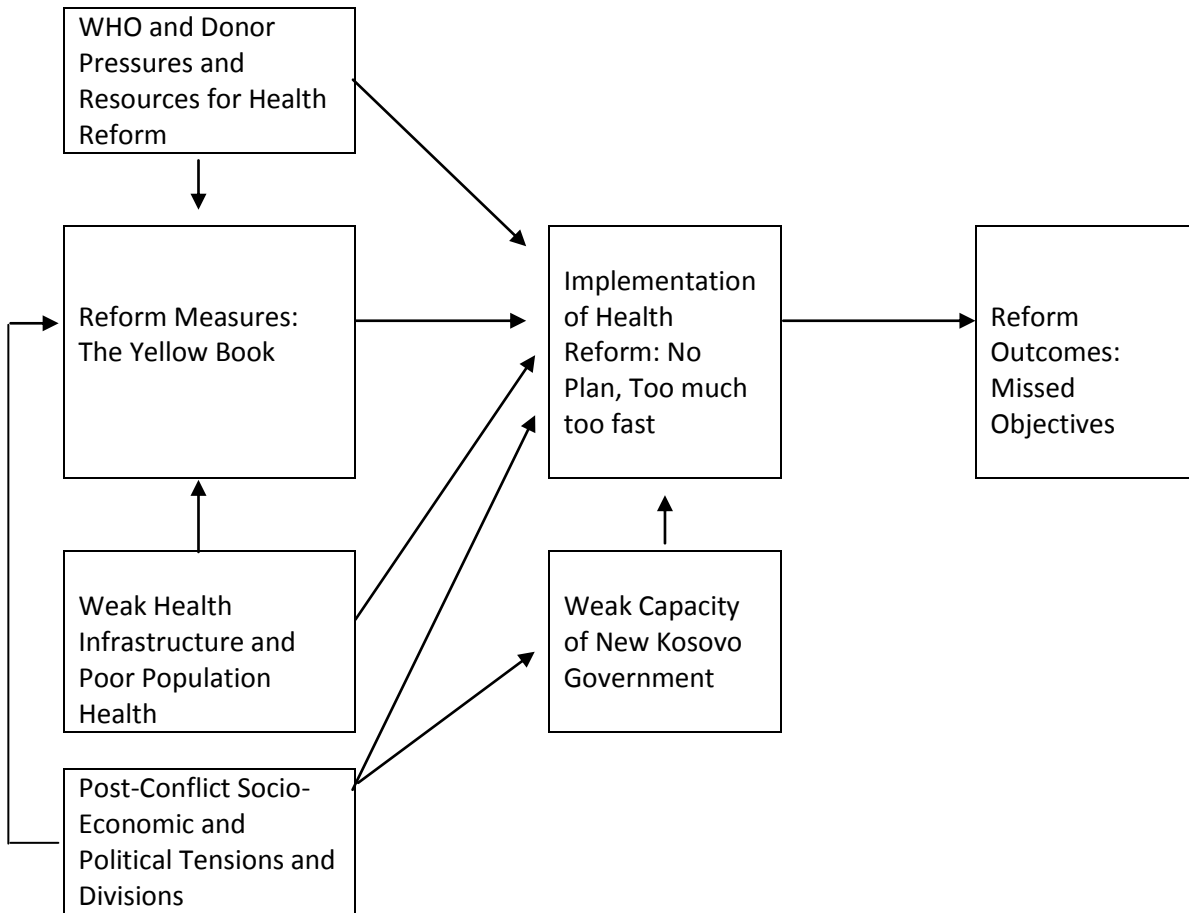

Supplement: MOESM2 [file 9645044]
